# Supplementary material for: Cleavage of lignin C–O bonds over a heterogeneous rhenium catalyst through hydrogen transfer reactions
Source: Royal Society of Chemistry journal article supplement (doi:10.1039/c9gc01710k), 2019-01-01
Supplement: c9gc01710k1.pdf [file c9gc01710k1.pdf]

## Electronic Supplementary Information

### Cleavage of Lignin C-O Bonds over a Heterogeneous Rhenium Catalyst through Hydrogen Transfer Reactions

Bo Zhang,<sup>a</sup> Zaojuan Qi,<sup>a</sup> Xinxin Li,<sup>a</sup> Jianwei Ji,<sup>b</sup> Leilei Zhang,<sup>a</sup>

Hua Wang,<sup>a</sup> Xiaoyan Liu,<sup>a</sup> Changzhi Li<sup>\*a,c</sup>

<sup>a</sup>State Key Laboratory of Catalysis, Dalian Institute of Chemical Physics, Chinese Academy of Sciences, 457 Zhongshan Road, Dalian, 116023, China.

<sup>b</sup>Shaanxi Key Laboratory of Catalysis, School of Chemistry and Environment Science, Shaanxi University of Technology, 1 Dongyihuan Road, Hanzhong, 723001, China.

<sup>c</sup>Dalian National Laboratory for Clean Energy, 457 Zhongshan Road, Dalian, 116023, China.

# General

## Instruments

All lignin model compounds  $\beta$ -hydroxy ether substrates were prepared as described in the literature.<sup>1</sup> d<sup>5</sup>-pyridine, and d<sup>6</sup>-DMSO is purchased from Arcos Organics were used without further purification. Elemental analysis of dissolved catalyst was accomplished using a Thermo iCAP Model 6300 Inductively Coupled Plasma Atomic Emission Spectrometer (ICP-AES). IR spectra were recorded on an Bruker Equinox 55 spectrometer. The molecular weights of lignin and residues were analyzed with a gel permeation chromatograph (Viscotek TDAmix) in tetrahydrofuran. Acetylation was performed using acetic anhydride and pyridine at room temperature for 48 h. The molecular weights were calibrated using polystyrene standards. NMR spectra were recorded on a Bruker Avance DPX-400 and Bruker AVANCE III HD 700MHz spectrometer at room temperature, and solvent peak was used as internal reference. The 2D <sup>13</sup>C-<sup>1</sup>H HSQC experiment was acquired using standard Bruker pulse sequence 'hsqcetgpsp 2.2' (phase sensitive gradient –enhanced 2D heteronuclear single quantum coherence (HSQC)). The 50 mg lignin was dissolved in 0.5 mL 4:1 d<sup>6</sup>-DMSO: d<sup>5</sup>-Pyridine. Nitrogen adsorption-desorption measurements were performed at –196 °C with a Micromeritics ASAP2010 instrument. Gas chromatography-mass spectroscopy (GC-MS) was performed on Varian 450GC-320 MS with FID detector and HP-5 capillary column. Catalytic runs were monitored by Agilent 7890 with HP-5 capillary column (30 m × 0.32 mm × 0.25  $\mu$ m) using mesitylene as internal standard and the gases were collected and analyzed by GC-TCD. Temperature programmed reduction of hydrogen (H<sub>2</sub>-TPR-MS) were conducted on a MicromeriticsAutoChem II 2920 chemisorber. The results were recorded by Mass spectrum. In TPR measurement, the samples were pretreated in Ar for 1h to remove adsorbed water, and then cooled to -80 °C, until baseline is stable, the gas flow was switched to 10% H<sub>2</sub>/Ar and the sample was heated from room temperature to 900 °C with a temperature ramp of 10 °C/min. The amount of H<sub>2</sub> consumption was monitored by a thermal conductivity detector (TCD), while a cold trap (a mixture of isopropanol and liquid nitrogen) was placed to remove generated water.

Matrix assisted Laser desorption/ionization time-of-flight mass spectrometry (MALDI-TOF) was

carried out to check the oil molecular weight distribution in absciex TOF-5800. A 15 g/L solution of DHB (2,5-dihydroxylbenzoic acid) in methanol was used as matrix. The analyses were developed in negative mode. X-ray absorption fine structure (XAFS) spectra at Re L<sub>3</sub>-edge were recorded at the 14W beamline of Shanghai Synchrotron Radiation Facility (SSRF) in China. The beam line employs a double Si (111)-crystal monochromator for energy selection with a resolution better than  $2 \times 10^{-4}$ . The catalyst was transferred to glove box without exposure to air before measurement. Re powder, commercial ReO<sub>2</sub>, Re<sub>2</sub>O<sub>7</sub> and NH<sub>4</sub>ReO<sub>4</sub> were used as reference samples. The collected data were processed by Athena software package.

## Catalyst preparation

The MO<sub>x</sub>/AC (AC, NORIT, M = Re, W, V, Mo) catalysts were prepared by impregnating the AC with an aqueous solution of NH<sub>4</sub>ReO<sub>4</sub>, (NH<sub>4</sub>)<sub>6</sub>H<sub>2</sub>W<sub>12</sub>O<sub>40</sub> • H<sub>2</sub>O, (NH<sub>4</sub>)<sub>6</sub>Mo<sub>7</sub>O<sub>24</sub> • 4H<sub>2</sub>O and NH<sub>4</sub>VO<sub>3</sub>. After drying at 110 °C for 12h, the MO<sub>x</sub>/AC was calcined in nitrogen at 500 °C for 3 h. The loading amount Re, W, Mo and V was 1.18%, 0.72%, 0.63%, 0.40%, respectively, which is determined by ICP-AES.

## Activity test

**Lignin extraction procedure:** All the lignin samples were prepared using a procedure previously described in the literature.<sup>2</sup> The poplar and wheat straw (20 mesh) were extracted with toluene-methanol (2:1) at 110 °C for 5 h in a Soxhlet apparatus before treatment. The extracted free powder (10 g) was transferred to a 400 mL stirred reactor and refluxed at 100 °C for 2 h, during which time the hemicellulose hydrolysis was catalyzed by 1.0 N H<sub>2</sub>SO<sub>4</sub>. The reaction mixture after hydrolysis was vacuum-filtered to obtain a solid residue and a filtrate containing the acid-soluble lignin and sugars. The lignin fraction in the filtrate was precipitated at pH 1.5 over 24 h at 20 °C, then filtered, washed with pH 2.0 H<sub>2</sub>SO<sub>4</sub> solvent and air dried. The residue was delignified with ethanol-water (60/40, v/v) in 400 mL 1.0 N H<sub>2</sub>SO<sub>4</sub> at 75 °C for another 2 h. After filtration, the filtrate was evaporated at 40 °C in a rotary vacuum evaporator to remove ethanol, the lignin from the black liquor was precipitated at pH 1.5 over 24 h at 20 °C, filtered, washed with water and air dried, obtaining 0.5 g organosolv poplar lignin (5 wt% based on woody powder), and 0.4 g organosolv wheat lignin (4 wt% based on woody powder).

**General procedure for  $\text{ReO}_x/\text{AC}$  catalyzed lignin model compounds:** The catalytic reaction was performed in a Parr autoclave (Parr, 75 mL). Typically, the model compound (0.41 mmol), catalyst (1.6 mol% Re), the standard mesitylene (18 mg) and isopropanol (15 mL) were placed to the autoclave (Parr, 75 mL) and flushed by  $\text{N}_2$  for several times. The reaction vessel was conducted at 200 °C with 100 psi  $\text{N}_2$  and stirred (800 rpm) for 3 h. After reaction, the gases were collected and the liquid phase was analyzed by gas chromatography with a flame ionization detector (GC-FID) employing the mesitylene as an internal standard (HP-5 column, 30 m  $\times$  0.32 mm  $\times$  0.25  $\mu\text{m}$ ). For recycling experiment, after reaction, the solution was filtrated, then the catalyst was dried at 60 °C within 5 h for next use.

**Quantify the mass of lignin oil after reaction:** The catalytic conversion of lignin material was carried out in a stainless-steel autoclave (Parr, 75 mL) with an initial  $\text{N}_2$  pressure of 100 psi and 200 °C for 8 h. Typically, lignin (100 mg),  $\text{ReO}_x/\text{AC}$  (1.6 mol% Re), and isopropanol (15 mL) were charged in the autoclave and stirred at rate of 800 rpm. After reaction, the reaction mixture was cooled to room temperature and was filtered. The gases were collected in a gas bag. The solid residue was washed with isopropanol and was dried at 50 °C under vacuum for 2D-HSQC-NMR characterization. The liquid was vacuumed at 30 °C to afford a liquid oil. Noting that lignin does not dissolve in ethyl acetate, ethyl acetate was added (3 $\times$ 15 mL) in the oil to extract the low molecular aromatic products. The extraction liquid was collected, then evaporated at 30 °C to remove solvent, affording a 54.0% yield of oil products from organosolv poplar lignin (OPL) and a 50.2% yield from organosolv wheat lignin (OWL). The liquid oil was then diluted to 2 mL with isopropanol, the monomer products in liquid oil were analyzed by HP 5973 GC-MS (HP-5 column, 30 m  $\times$  0.32 mm  $\times$  0.25  $\mu\text{m}$ ) and quantified by GC-FID using an internal standard method (standard: mesitylene). The molecular weight distribution of the liquid oil was analyzed by Matrix assisted laser desorption/ionization time-of-flight mass spectrometry.

**For recycling experiment of catalytic OPL reaction:** after reaction, the solution was filtrated. The organic solution was evaporated at 35 °C to remove isopropanol. And the solid including the catalyst and residue was dried for next use. The fresh OPL and isopropanol was directly added into the autoclave for next recycle. The quantify and qualitative of the oil products was determined by above mentioned method.

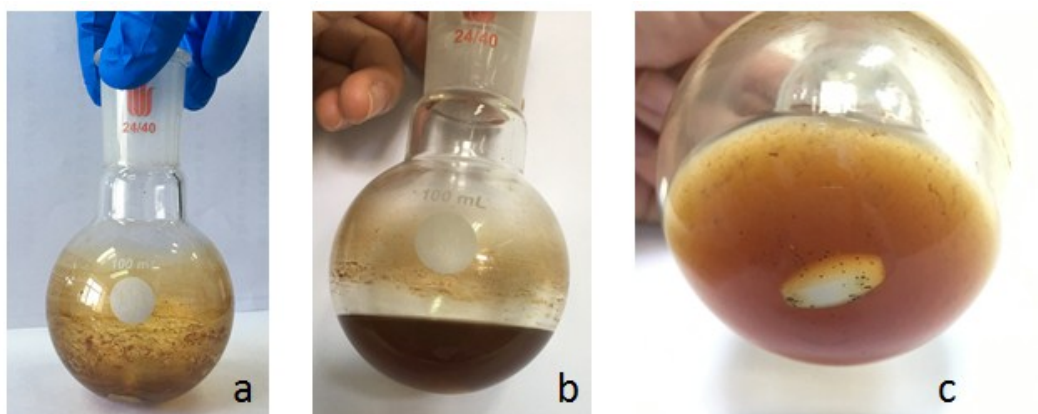

**Figure S1** (a) the oil products after evaporation of the solvent; (b) after adding the ethyl acetate; (c) lignin precipitate in the ethyl acetate solution.

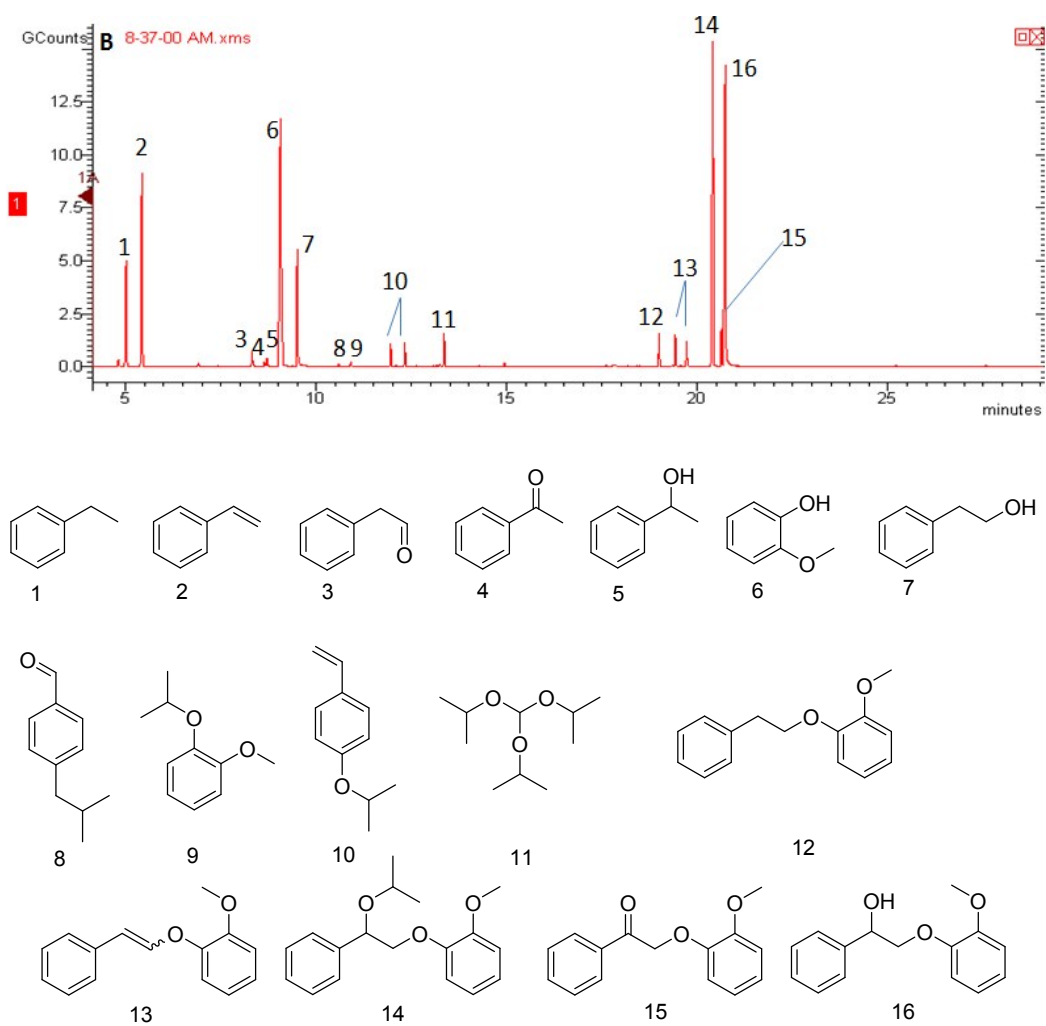

**Figure S2** GC-MS spectrum and identification of compounds of the reaction mixture for the conversion of model compound **1** catalyzed by active carbon.

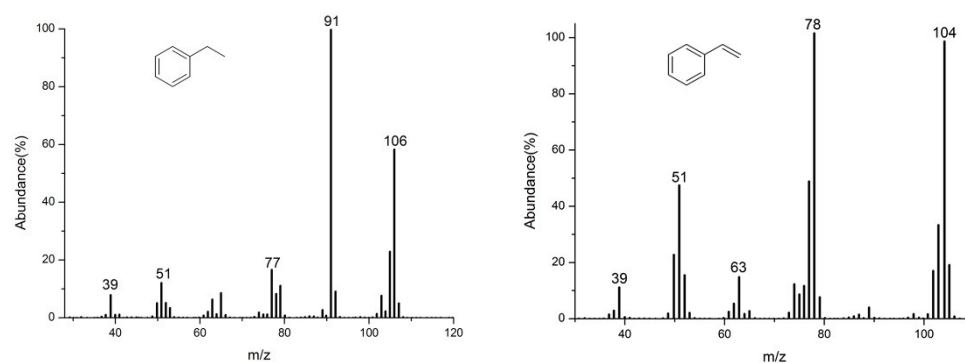

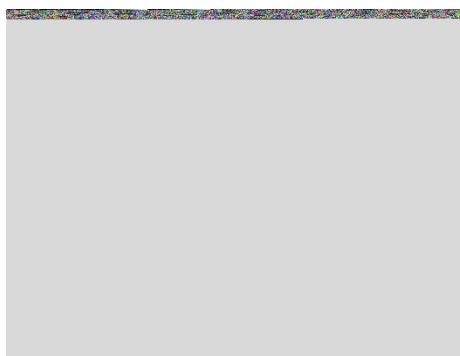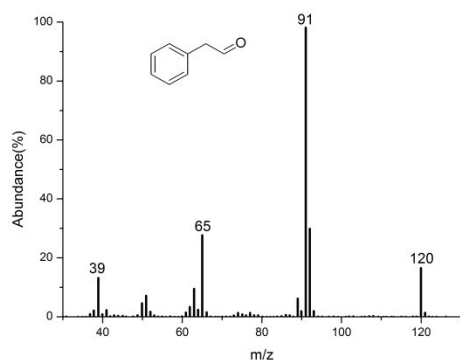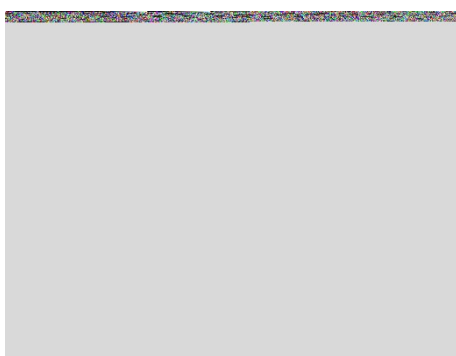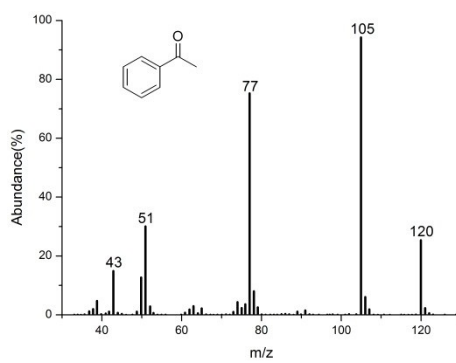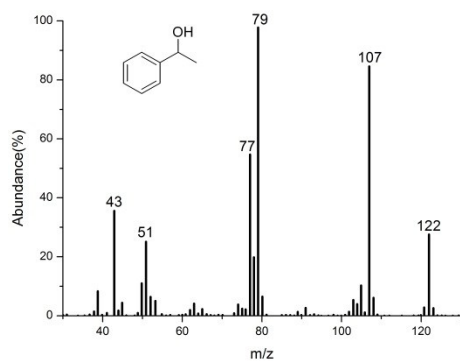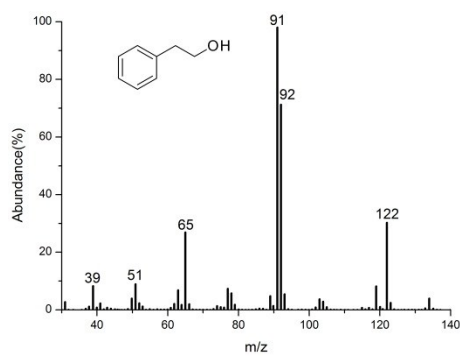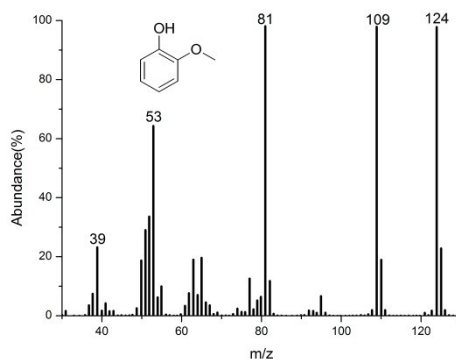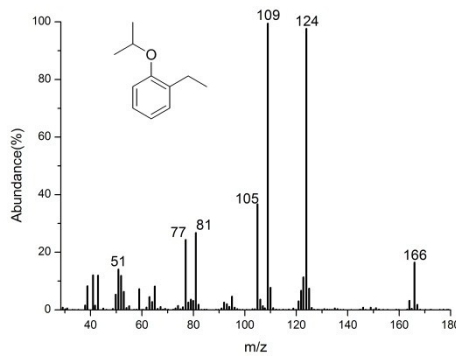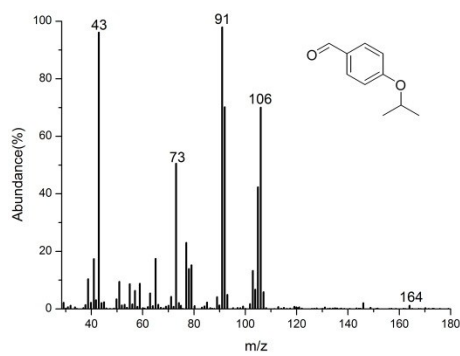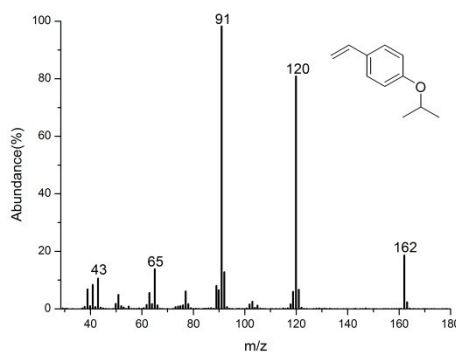

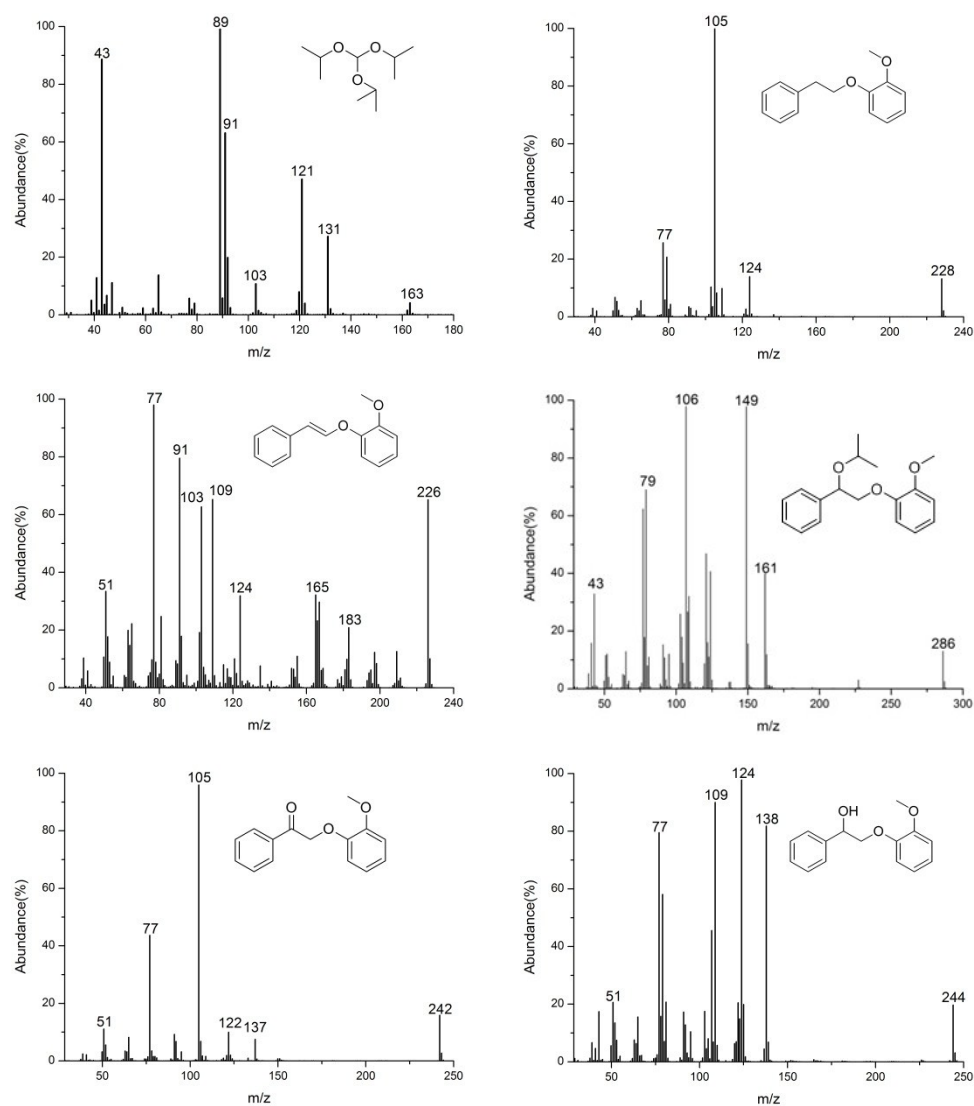

**Figure S3.** GC-MS spectra of various products

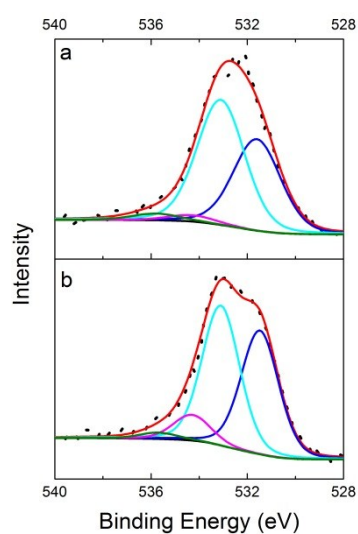

**Figure S4** XPS patterns of O1S for the active carbon (a: fresh carbon, b: carbon after boiling with  $\text{HNO}_3$  (activate carbon-AC)).



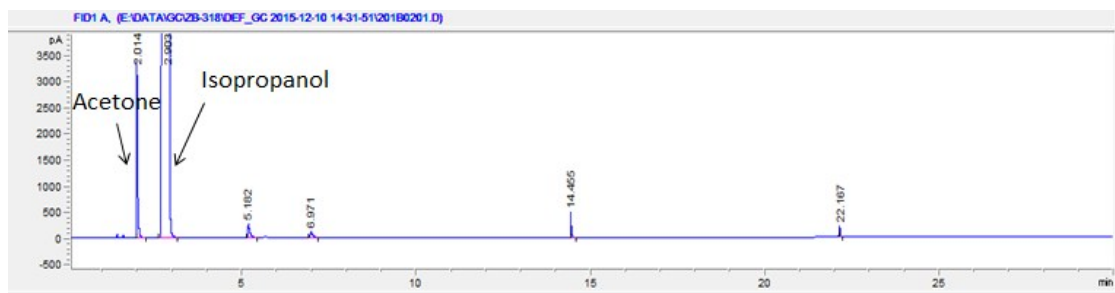

**Figure S5.** Acetone detected by GC-FID.

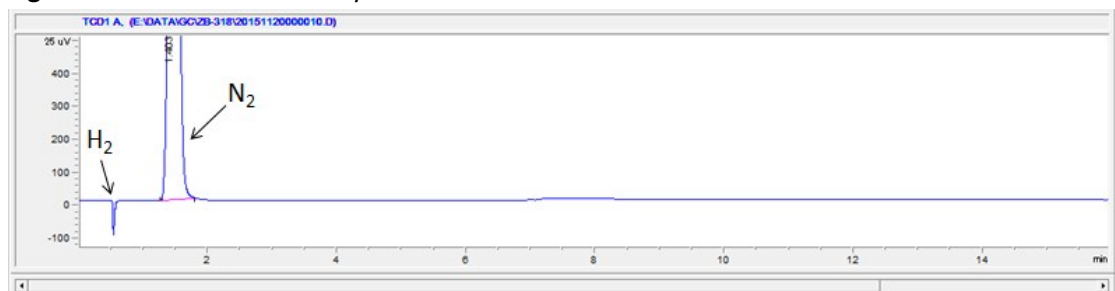

**Figure S6.** Gases analyzed by GC-TCD.

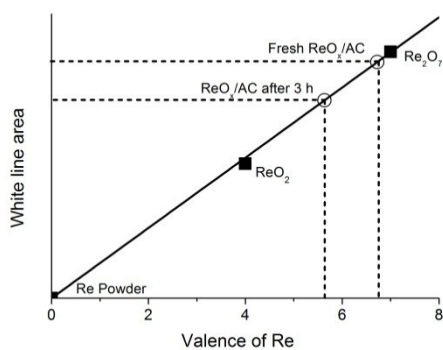

**Figure S7** Relation between white line area and valence of Re

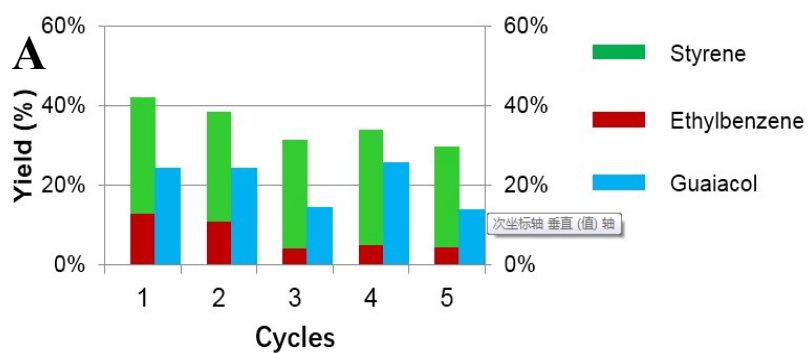

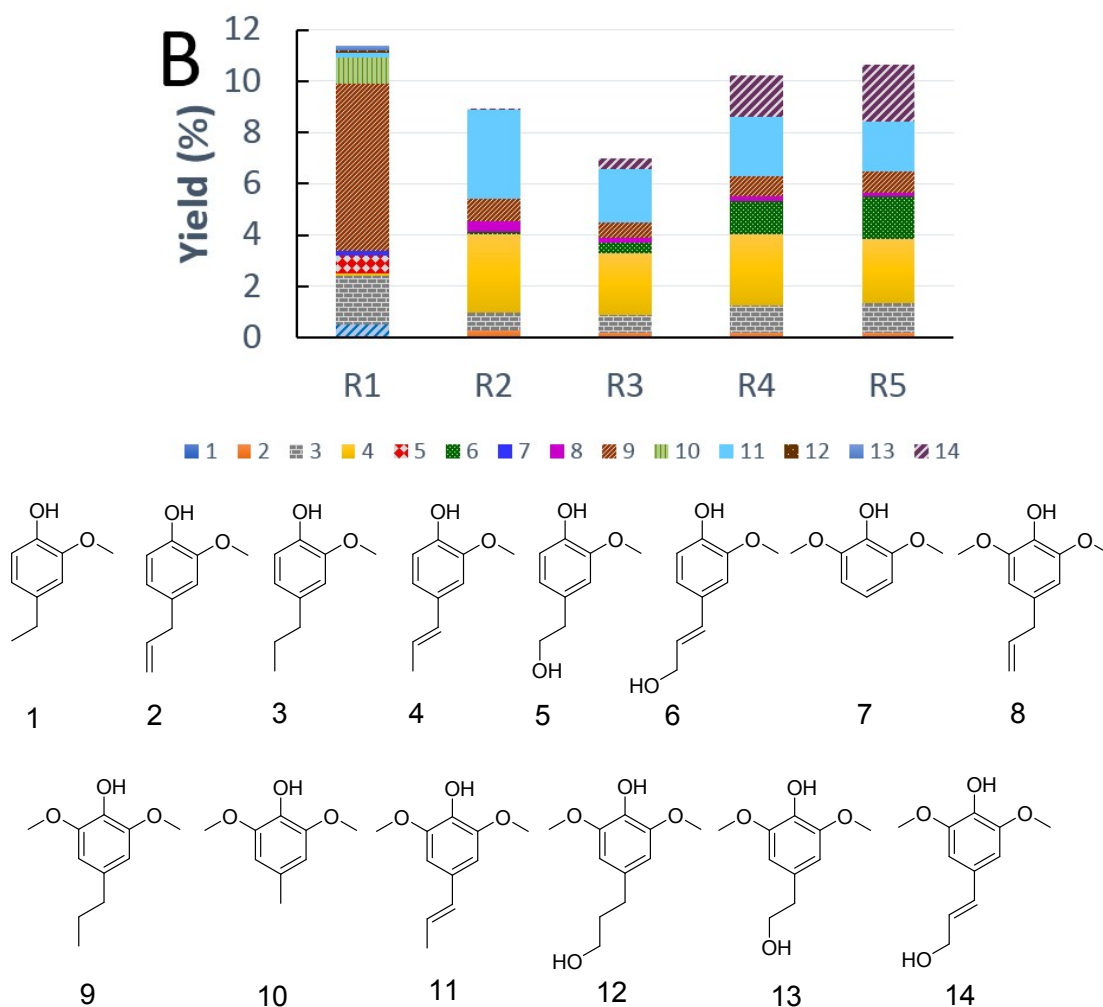

**Figure S8.** (A) Recycling test in the conversion of lignin model compound **1** over  $\text{ReO}_x/\text{AC}$ . Condition: 2-(2-methoxyphenoxy)-1-phenylethanol (100 mg),  $\text{ReO}_x/\text{AC}$  (1.18 wt% Re, 1.58 mol% Re),  $i\text{PrOH}$  (15 mL) and mesitylene (18 mg) were charged in a stainless-steel autoclave (Parr, 75 mL) with an initial  $\text{N}_2$  pressure of 100 psi at 160 °C for 3 h; (B) Recycling test in the depolymerization of organsolv poplar lignin (OPL) over  $\text{ReO}_x/\text{AC}$ . Condition: OPL = 100 mg,  $\text{ReO}_x/\text{AC}$  (1.18 wt% Re, 1.6 mol% Re),  $i\text{PrOH}$  (15 mL) were charged in a stainless-steel autoclave (Parr, 75 mL) with an initial  $\text{N}_2$  pressure of 100 psi at 100 °C for 8 h.



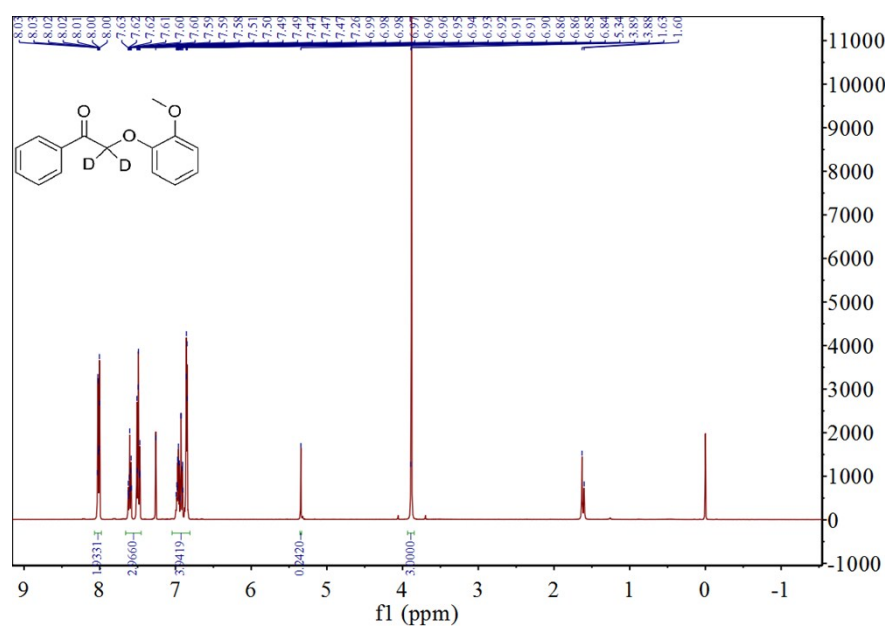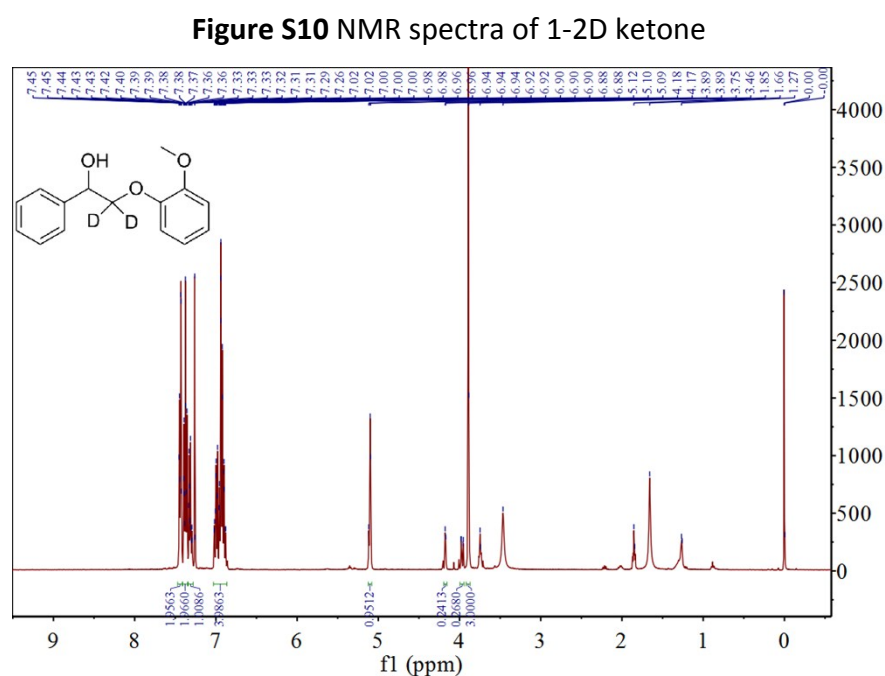

### Conversion of deuterium labeling of 2-(2-methoxyphenoxy)-1-phenylethanol (1-2D)

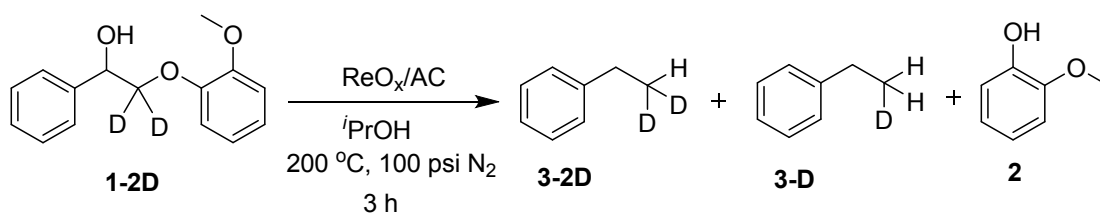

**Scheme S2.** Conversion of 1-2D over  $\text{ReO}_x/\text{AC}$  in dry  $i\text{PrOH}$  at  $200^\circ\text{C}$  for 3 h

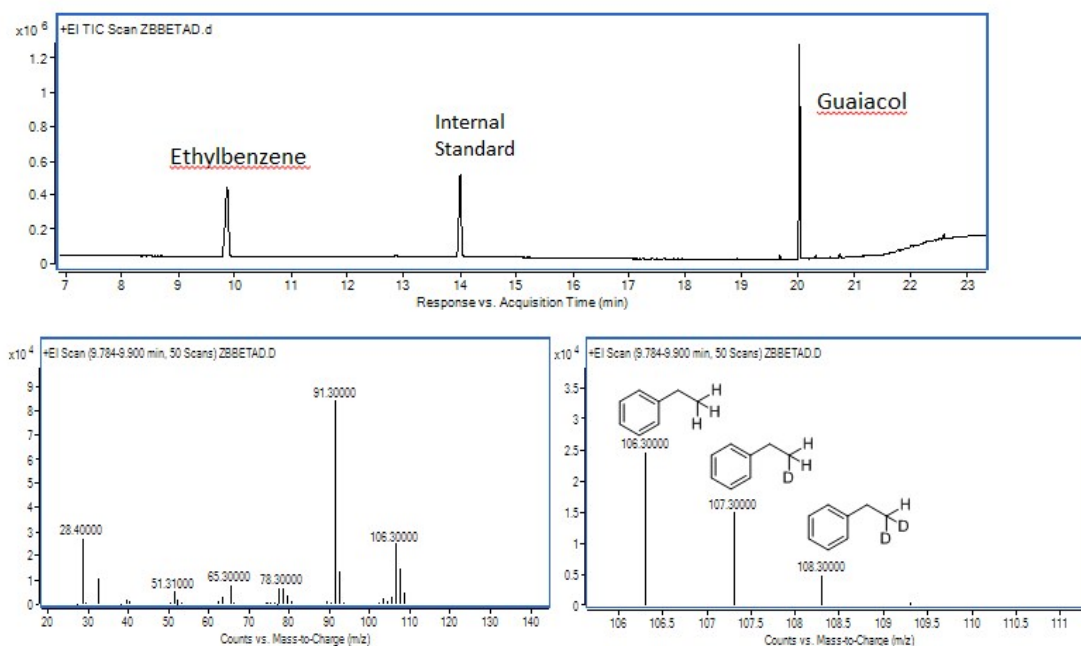

**Figure S12** MS spectra of **1-2D** reaction solution.

The labeling substrate **1**  $\text{PhCHOHCD}_2\text{OPhOCH}_3$  we used in the labeling experiment is 75%D according to the NMR results (Figure S6.2). The labeling D on the C2 position is somewhat sensitive to moisture, and D is easily exchanged by H when meeting  $\text{H}_2\text{O}$ . MS spectrum showed that ethylbenzene was the major product. This is because that one part of ethylbenzene was produced from 25% unlabeled substrate, and other ethylbenzene was from  $\text{PhCH}_2\text{CH}_2\text{D}$  and  $\text{PhCH}_2\text{CHD}_2$  that exchanged by H due to the presence of water from dehydration reaction. Nevertheless, the isotopically-labeling experiment proved that both dehydration and hydrogenolysis occurred owing to the formation of dehydration product **3-D** and hydrogenolysis product **3-2D**.

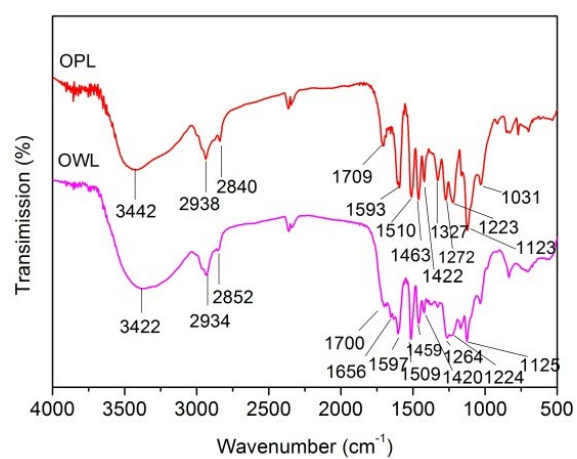

**Figure S13** FTIR spectra of OPL and OWL

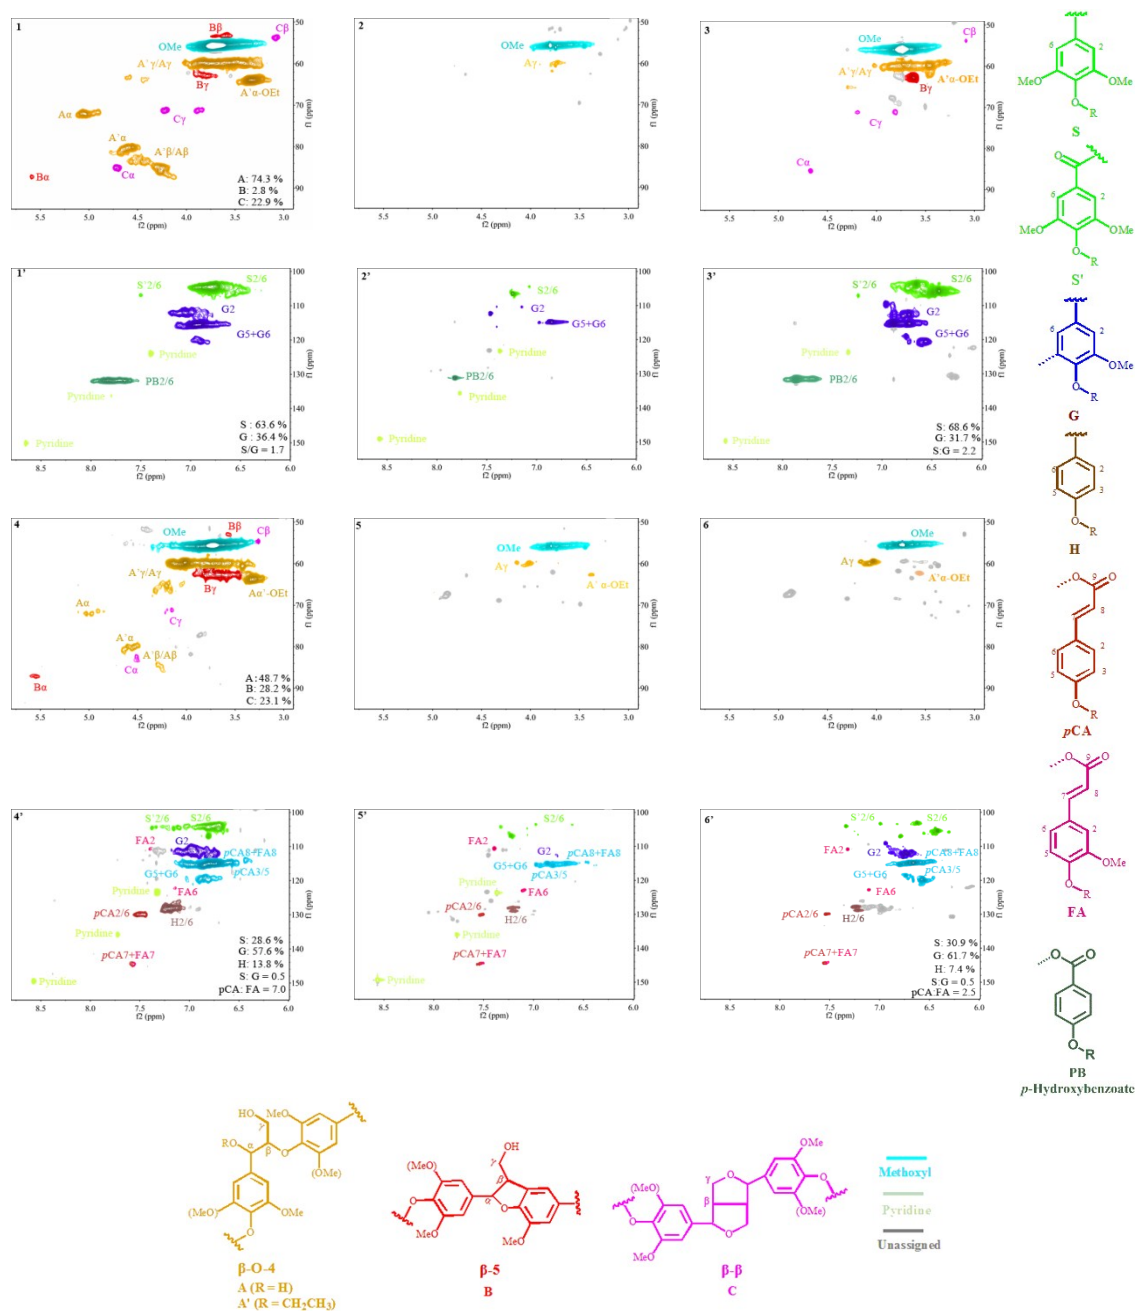

**Figure S14** 2D-HSQC-NMR spectra of various lignin. (1 and 1') isolated organosolv poplar lignin (OPL); (2 and 2') the residue after catalytic OPL reaction; (3 and 3') the oil production after catalytic OPL reaction; (4 and 4') isolated organosolv wheat straw lignin (OWL); (5 and 5') the residue after catalytic OWL reaction; (6 and 6') the oil production after catalytic OWL reaction. 1-5 are dissolved in 4:1 DMSO-d<sub>6</sub>:pyridine-d<sub>5</sub>; and 6 are dissolved in DMSO-d<sub>6</sub>.

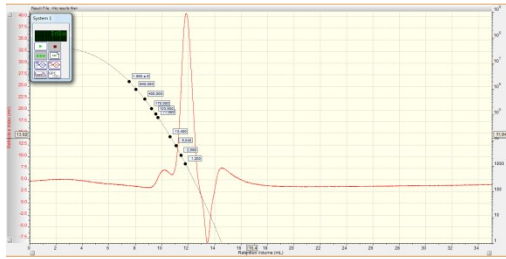

OPL

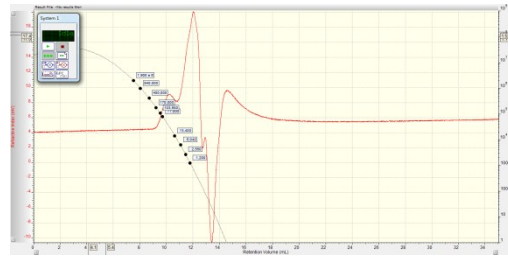

OPL-Residue

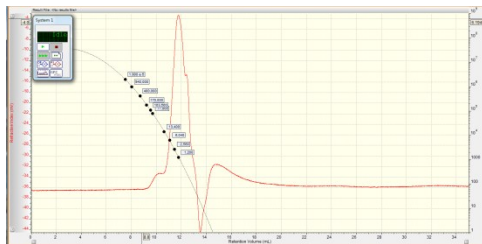

OWL

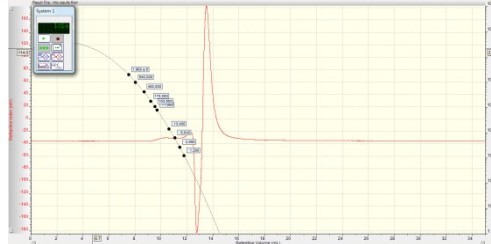

OWL-Residue

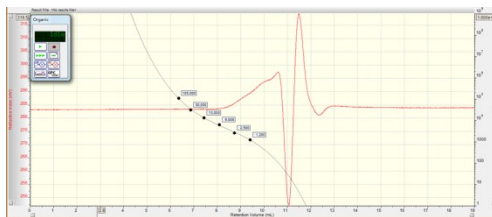

OPL Oil

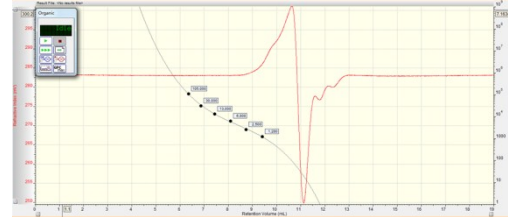

Wheat Oil

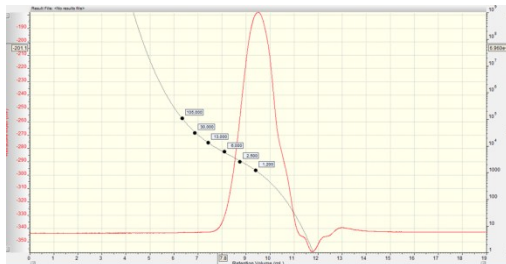

Blank

**Figure 15** GPC spectra of lignin and lignin oil



To look insight into the change of the structure before and after reaction, measuring the volume integrals of various cross peaks in 2D HSQC NMR spectra were performed according to reported literatures methods.<sup>4</sup> Volume integration (linkages/100 C9 units) allows for estimation of the differences in interunit linkage composition. It suggested that the signals of substructure **A** and **B** were obvious vanished for OPL and OWL oils. The **C** linkage remained for OPL oil. We therefore speculated that **B** and **C** likely did not give rise to monomers directly during this catalytic process although their signals obviously decreased after reaction, probably due to the change or modification of the structure in such a complicated process. The different conversion performance of the two lignins (OPL, OWL) could attribute to the structural variations of the different biomass resources.

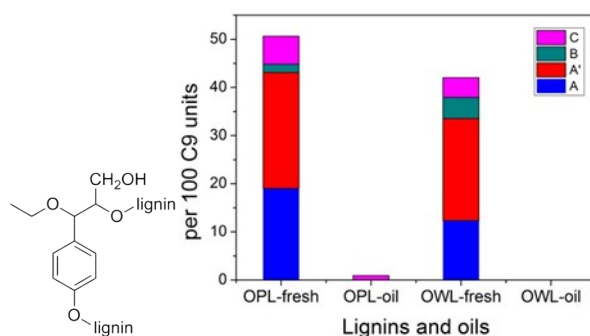

**Figure S16** (left) **A'** structure-nucleophilic addition of ethanol, (right) **A**, **B** and **C** linkages per 100 C9 units in various lignins and oils.

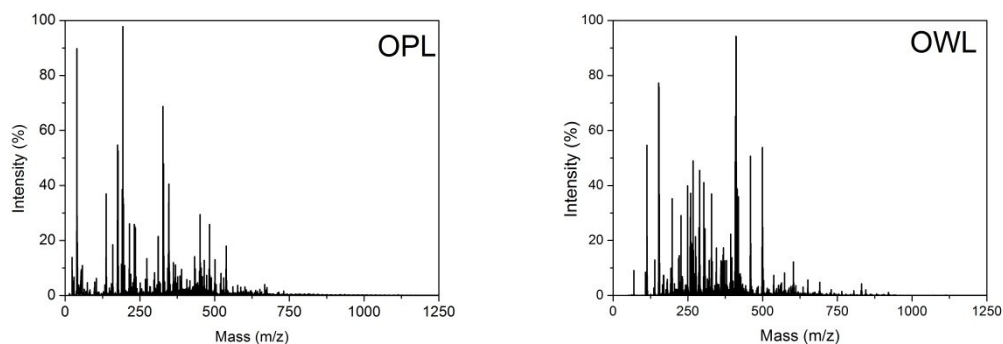

**Figure S17** Expanded MALDI-TOF oil analyses of OPL and OWL.

**Table S1.** The assignment of the XPS peaks shown in **Figure S4**

| Element | Peak assignment                                                                   | C                   |             | AC                  |             |
|---------|-----------------------------------------------------------------------------------|---------------------|-------------|---------------------|-------------|
|         |                                                                                   | Binding energy (eV) | Content (%) | Binding energy (eV) | Content (%) |
| O 1s    | C=O<br>(quinones)                                                                 | 531.6               | 39.9        | 531.5               | 41.9        |
|         | C-O<br>(phenols)                                                                  | 533.1               | 54.5        | 533.1               | 47.3        |
|         | 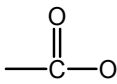 | 534.3               | 2.7         | 534.3               | 8.7         |
|         | Adsorbed H <sub>2</sub> O                                                         | 535.8               | 2.9         | 535.7               | 2.1         |

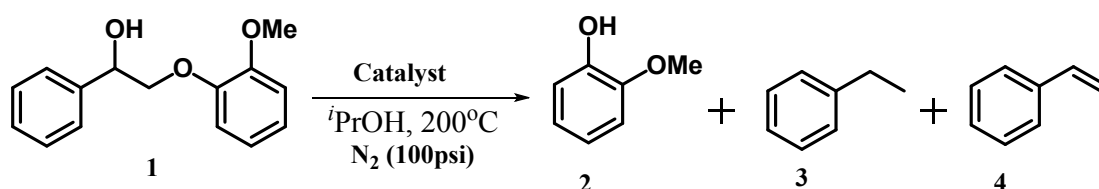**Table S2** Cleavage of C-O bonds in lignin model compound **1** over various catalysts.<sup>[a]</sup>

| Entry | Cat.                               | Conv.<br>[%] <sup>[b]</sup> | Yield [%] <sup>[b]</sup> |          |          |            |
|-------|------------------------------------|-----------------------------|--------------------------|----------|----------|------------|
|       |                                    |                             | <b>2</b>                 | <b>3</b> | <b>4</b> | <b>3+4</b> |
| 1     | NH <sub>4</sub> ReO <sub>4</sub>   | 4.4                         | --                       | 2.2      | 1.9      | 4.1        |
| 2     | Re <sub>2</sub> O <sub>7</sub>     | 10.2                        | 0                        | 3.0      | 1.9      | 4.9        |
| 3     | Re <sub>2</sub> O <sub>7</sub> +AC | 45.7                        | 33.3                     | 20.6     | 8.8      | 29.4       |

<sup>[a]</sup> Reaction condition: compound **1** (100 mg, 0.41 mmol), 1.6 Re mol %, *i*PrOH = 15 mL, T = 200 °C, t = 3 h, P = 100 psi (N<sub>2</sub>), AC = activate carbon.

<sup>[b]</sup> Conversion and yields were determined by GC-FID with mesitylene as an internal standard.

**Table S3.** Cleavage of C-O bond in compound **1** over various rhenium oxide<sup>[a]</sup>

| Entry | Cat.                                | Conv.<br>[%] <sup>[b]</sup> | Yield [%] <sup>[b]</sup> |          |          |            |
|-------|-------------------------------------|-----------------------------|--------------------------|----------|----------|------------|
|       |                                     |                             | <b>2</b>                 | <b>3</b> | <b>4</b> | <b>3+4</b> |
| 1     | NH <sub>4</sub> ReO <sub>4</sub>    | 4.4                         | 0                        | 2.2      | 1.9      | 4.1        |
| 2     | Re <sub>2</sub> O <sub>7</sub>      | 10.2                        | 0                        | 3.0      | 1.9      | 4.9        |
| 3     | N(Bu) <sub>4</sub> ReO <sub>4</sub> | --                          | --                       | --       | --       | --         |
| 4     | ReO <sub>3</sub>                    | --                          | --                       | --       | --       | --         |
| 5     | ReO <sub>2</sub>                    | --                          | --                       | --       | --       | --         |

<sup>[a]</sup> Reaction condition: compound **1** (100 mg), 1.58 Re mol %, *i*PrOH = 15 mL, T = 200 °C, t = 3 h, P = 100 psi (N<sub>2</sub>).

**Table S4** The assignment of the XPS peaks shown in **Figure 1** in the article.

| Entry | Species              | BE<br>[eV] | Content<br>[%] |
|-------|----------------------|------------|----------------|
| 1     | Re <sup>VI-VII</sup> | 45.8       | 35.4           |
| 2     | Re <sup>V</sup>      | 43.5       | 46.7           |
| 3     | Re <sup>III</sup>    | 41.8       | 10.7           |
| 4     | Re <sup>II</sup>     | 41.0       | 7.2            |

**Table S5** The assignment of the XPS peaks shown in **Figure S9**.

| Entry | Species              | BE<br>[eV] | Content<br>[%] |
|-------|----------------------|------------|----------------|
| 1     | Re <sup>VI-VII</sup> | 45.8       | 82.3           |
| 2     | Re <sup>V</sup>      | 43.6       | 13.1           |
| 3     | Re <sup>0-IV</sup>   | 41.8       | 4.5            |

**Table S6** Band assignment of FTIR spectra

| OPL  | OWL  | Band Assignment                                                                         |
|------|------|-----------------------------------------------------------------------------------------|
| 3442 | 3422 | O-H Stretching                                                                          |
| 2938 | 2934 | C-H stretch in methyl and methylene groups                                              |
| 2840 | 2852 | C-H stretch in methyl and methylene groups                                              |
| 1709 | 1700 | C=O stretch in unconj. Ketones, carbonyl and ester groups                               |
|      | 1656 | C=O stretch in conjugated p-subst. aryl ketones                                         |
| 1593 | 1597 | Aromatic skeletal vibration (S>G) plus C=O stretching                                   |
| 1510 | 1509 | Aromatic skeletal vibrations (G>S)                                                      |
| 1463 | 1459 | C-H asymmetric deformations in methyl and methylene groups                              |
| 1422 | 1420 | Aromatic skeletal vibrations combined with C-H in plane deformations                    |
| 1327 | 1329 | S ring breathing + G ring substituted in position 5                                     |
| 1272 | 1264 | G ring breathing and C=O stretching                                                     |
| 1223 | 1224 | C-C plus C-O plus C=O stretching                                                        |
| 1123 | 1125 | Syringyl ring breathing                                                                 |
| 1031 | 1032 | Aromatic C-H in-plane deformations in G units plus C-O deformations in primary alcohols |
| 916  |      | Aromatic C-H out of plane deformation                                                   |

**Table S7** GPC analysis of acetylated lignin and corresponding residue after catalytic reaction.

|   | Lignin      | M <sub>w</sub> | M <sub>n</sub> | M <sub>w</sub> /M <sub>n</sub> |
|---|-------------|----------------|----------------|--------------------------------|
| 1 | OPL         | 1707           | 847            | 2.02                           |
| 2 | OPL-Residue | 897            | 629            | 1.35                           |
| 3 | OPL-Oil     | 710            | 264            | 2.69                           |
| 4 | OWL         | 2403           | 1083           | 2.22                           |
| 5 | OWL-Residue | 897            | 629            | 1.43                           |
| 6 | OWL-Oil     | 618            | 249            | 2.48                           |

**Table S8** Identification and quantification of products obtained from the depolymerization of OPL and OWL.<sup>[a]</sup>

| Monomer name    | Structural formula                                                                  | Unit type | Yield [wt%] <sup>[b]</sup> |                        |     |                        |     |
|-----------------|-------------------------------------------------------------------------------------|-----------|----------------------------|------------------------|-----|------------------------|-----|
|                 |                                                                                     |           | Blank-OPL <sup>[c]</sup>   | OPL(AC) <sup>[d]</sup> | OPL | OWL(AC) <sup>[d]</sup> | OWL |
| Guaiacol        |   | G         | --                         | --                     | --  | --                     | 0.1 |
| Guaiacylethane  |  | G         | --                         | --                     | 0.5 | 0.1                    | 0.6 |
| Guaiacylpropane |  | G         | 0.1                        | 0.1                    | 1.9 | --                     | 0.8 |
| Guaiacylpropene |  | G         | 0.2                        | 0.2                    | 0.1 | 0.1                    | 0.5 |
| p-Vinylguaiacol |  | G         | --                         | --                     | --  | --                     | 0.1 |
| 5-allylguaiacol |  | G         | 0.2                        | 0.1                    | --  | --                     | --  |
| Guaiacylethanol |  | G         | --                         | --                     | 0.7 | --                     | 0.3 |

|                                              |                                                                                     |   |     |     |     |     |     |
|----------------------------------------------|-------------------------------------------------------------------------------------|---|-----|-----|-----|-----|-----|
| Acetoguaiacone                               | 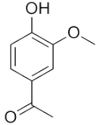   | G | 0.2 | --  | --  | --  | --  |
| <i>p</i> -Vanillin                           |    | G | 0.4 | --  | --  | --  | --  |
| isopropyl 4-hydroxy-3-methoxybenzoate        |    | G | 0.2 | --  | --  | --  | --  |
| methyl 3-(4-hydroxyphenyl)propionate         |    | H | --  | --  | --  | 0.2 | 0.4 |
| methyl 3-(4-hydroxy-3-methoxyphenyl)acrylate |   | G | --  | --  | --  | 0.4 | 0.5 |
| 2,6-Dimethylphenol                           |  | S | --  | --  | 0.2 | --  | --  |
| 4-Methylsyringol                             |  | S | --  | --  | 1.0 | --  | --  |
| 4-Propylsyringol                             |  | S | --  | 2.0 | 6.5 | 0.2 | 1.1 |
| 4-Allylsyringol                              |  | S | 0.1 | --  | 0.2 | 0.2 | 0.3 |
| 2,6-Dimethoxy-4-allylphenol                  |  | S | 0.5 | 0.2 | --  | --  | --  |

|                                                |                                                                                    |   |      |      |      |      |      |
|------------------------------------------------|------------------------------------------------------------------------------------|---|------|------|------|------|------|
| 4-(2-hydroxyethyl)-<br>2,6-<br>dimethoxyphenol | 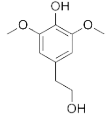  | S | --   | --   | 0.1  | --   | --   |
| Dihydrosyringenin                              |   | S | --   | --   | 0.2  | --   | --   |
| Syringic aldehyde                              |   | S | 0.3  | --   | --   | --   | --   |
| 4-Ethylphenol                                  |   | H | --   | --   | --   | --   | 0.4  |
| Phenol                                         |   | H | --   | --   | --   | --   | --   |
| ethyl 3-(4-<br>hydroxyphenyl)acry-<br>late     |  | H | --   | --   | --   | --   | 0.2  |
| <hr/>                                          |                                                                                    |   |      |      |      |      |      |
| Total monomers                                 |                                                                                    |   | 2.2  | 2.6  | 11.4 | 1.2  | 5.3  |
| Oil yield                                      |                                                                                    |   | 30.2 | 36.0 | 54.0 | 34.0 | 50.2 |
| <hr/>                                          |                                                                                    |   |      |      |      |      |      |
| Monomer in Oil                                 |                                                                                    |   | 7.3  | 7.2  | 21.1 | 3.5  | 10.6 |
| [wt%]                                          |                                                                                    |   |      |      |      |      |      |

[a] Reaction condition: a stainless-steel autoclave (Parr, 75 mL) was charged with lignin (100 mg),  $\text{ReO}_x/\text{AC}$  catalyst (1.6 mol% Re), and isopropanol (15 mL) with an initial  $\text{N}_2$  pressure of 100 psi and reacting at 200 °C for 8 h. [b] The yield of aromatics were determined by GC-FID with an internal standard. [c] Reaction condition for Blank-OPL: stainless-steel autoclave (Parr, 75 mL) was charged with OPL (100 mg), and isopropanol (15 mL) with an initial  $\text{N}_2$  pressure of 100 psi and reacting at 200 °C for 8 h. [d] Reaction condition for OPL (AC) and OWL (AC): stainless-steel autoclave (Parr, 75 mL) was charged with OPL or OWL (100 mg), AC (100 mg), isopropanol (15 mL) with an initial  $\text{N}_2$  pressure of 100 psi and reacting at 200 °C for 8 h.

## References

---

- 1 Nichols, J. M.; Bishop, L. M.; Bergman, R. G.; Ellman, J. A. *J. Am. Chem. Soc.* 2010, **132**, 12554.
- 2 Lawther, J. M.; Sun, R. C.; Banks, W. B., *J. Wood Chem. Technol.* 1996, **16**, 439.
- 3 Riches, S. L.; Saha, C.; Filguera, N. F.; Grange, E.; McGarrigle, E. M.; Aggarwal, V. K., *J. Am. Chem. Soc.* 2010, **132**, 7626.
- 4 (a) Lancefield, C. S.; Ojo, O. S.; Tran, F.; Westwood, N. J., *Angew. Chem. Int. Ed.* 2015, **54**, 258;  
(b) Guo, H. W.; Miles-Barrett, D. M.; Neal, A. R.; Zhang, T.; Li, C. Z., *Chem. Sci.* 2018, **9**, 702-711.
